# Supplementary material for: Electronic spectra of uranyl chloride complexes in acetone: a CASSCF/CASPT2 investigation
Source: Royal Society of Chemistry journal article supplement (doi:10.1039/b607026d), 2006-01-01
Supplement: b607026d.pdf [file b607026d.pdf]

## Electronic supplementary information

**Table S-1.** Cartesian coordinates (Å) for UO<sub>2</sub>Cl<sub>2</sub>ac<sub>4</sub>.

|    | X         | Y         | Z         |
|----|-----------|-----------|-----------|
| U  | 0.000000  | 0.000000  | 0.000000  |
| O  | 0.000000  | 0.000000  | 1.807187  |
| O  | 0.000000  | 0.000000  | -1.807187 |
| Cl | 2.721728  | 0.000000  | 0.000000  |
| Cl | -2.721728 | 0.000000  | 0.000000  |
| O  | -1.167786 | 2.423003  | 0.453005  |
| O  | 1.167786  | -2.423003 | 0.453005  |
| O  | 1.167786  | 2.423003  | -0.453005 |
| O  | -1.167786 | -2.423003 | -0.453005 |
| C  | -1.841927 | 2.951108  | 1.341227  |
| C  | 1.841927  | -2.951108 | 1.341227  |
| C  | 1.841927  | 2.951108  | -1.341227 |
| C  | -1.841927 | -2.951108 | -1.341227 |
| C  | -2.349270 | 4.362327  | 1.153526  |
| C  | 2.349270  | -4.362327 | 1.153526  |
| C  | 2.349270  | 4.362327  | -1.153526 |
| C  | -2.349270 | -4.362327 | -1.153526 |
| C  | -2.238527 | 2.214312  | 2.589535  |
| C  | 2.238527  | -2.214312 | 2.589535  |
| C  | 2.238527  | 2.214312  | -2.589535 |
| C  | -2.238527 | -2.214312 | -2.589535 |
| H  | -3.451423 | 4.348349  | 1.128973  |
| H  | 3.451423  | -4.348349 | 1.128973  |
| H  | 3.451423  | 4.348349  | -1.128973 |
| H  | -3.451423 | -4.348349 | -1.128973 |
| H  | -2.061478 | 4.987676  | 2.012609  |
| H  | 2.061478  | -4.987676 | 2.012609  |
| H  | 2.061478  | 4.987676  | -2.012609 |

|   |           |           |           |
|---|-----------|-----------|-----------|
| H | -2.061478 | -4.987676 | -2.012609 |
| H | -1.965175 | 4.791124  | 0.221974  |
| H | 1.965175  | -4.791124 | 0.221974  |
| H | 1.965175  | 4.791124  | -0.221974 |
| H | -1.965175 | -4.791124 | -0.221974 |
| H | -2.975661 | 1.453990  | 2.276702  |
| H | 2.975661  | -1.453990 | 2.276702  |
| H | 2.975661  | 1.453990  | -2.276702 |
| H | -2.975661 | -1.453990 | -2.276702 |
| H | -1.381218 | 1.654645  | 2.984253  |
| H | 1.381218  | -1.654645 | 2.984253  |
| H | 1.381218  | 1.654645  | -2.984253 |
| H | -1.381218 | -1.654645 | -2.984253 |
| H | -2.676379 | 2.870754  | 3.351122  |
| H | 2.676379  | -2.870754 | 3.351122  |
| H | 2.676379  | 2.870754  | -3.351122 |
| H | -2.676379 | -2.870754 | -3.351122 |

**Table S-2.** Cartesian coordinates (Å) for  $\text{UO}_2\text{Cl}_2\text{ac}_3$ .

|    | X         | Y         | Z         |
|----|-----------|-----------|-----------|
| U  | 0.000000  | 0.000000  | 0.000000  |
| O  | 1.799961  | 0.000000  | 0.000000  |
| O  | -1.794251 | 0.143254  | 0.000000  |
| Cl | -0.031687 | -0.795026 | 2.579869  |
| Cl | -0.031687 | -0.795026 | -2.579869 |
| O  | -0.097284 | -2.440833 | 0.000000  |
| O  | 0.088048  | 2.209103  | 1.380037  |
| O  | 0.088048  | 2.209103  | -1.380037 |
| C  | -0.146350 | -3.671898 | 0.000000  |
| C  | -0.176477 | -4.427764 | 1.301978  |
| C  | -0.176477 | -4.427764 | -1.301978 |
| C  | 0.117728  | 2.953765  | 2.362374  |

|   |           |           |           |
|---|-----------|-----------|-----------|
| C | 0.117728  | 2.953765  | -2.362374 |
| C | 0.097381  | 2.443279  | 3.775354  |
| C | 0.097381  | 2.443279  | -3.775354 |
| C | 0.177479  | 4.452903  | 2.159540  |
| C | 0.177479  | 4.452903  | -2.159540 |
| H | 0.679609  | -5.118945 | 1.349163  |
| H | -1.084857 | -5.048619 | -1.349163 |
| H | -1.084857 | -5.048619 | 1.349163  |
| H | 0.679609  | -5.118945 | -1.349163 |
| H | -0.148476 | -3.725247 | 2.141680  |
| H | -0.148476 | -3.725247 | -2.141680 |
| H | 0.994905  | 2.800991  | 4.304811  |
| H | -0.768825 | 2.871288  | -4.304811 |
| H | -0.768825 | 2.871288  | 4.304811  |
| H | 0.994905  | 2.800991  | -4.304811 |
| H | 0.053745  | 1.348464  | 3.784533  |
| H | 0.053745  | 1.348464  | -3.784533 |
| H | 1.077749  | 4.861172  | 2.643801  |
| H | -0.687442 | 4.931528  | -2.643801 |
| H | -0.687442 | 4.931528  | 2.643801  |
| H | 1.077749  | 4.861172  | -2.643801 |
| H | 0.187074  | 4.693660  | 1.092596  |
| H | 0.187074  | 4.693660  | -1.092596 |

**Table S-3.** Cartesian coordinates (Å) for [UO<sub>2</sub>Cl<sub>3</sub>ac<sub>2</sub>]<sup>-</sup>.

|    | X         | Y         | Z         |
|----|-----------|-----------|-----------|
| U  | 0.000000  | 0.000000  | 0.000000  |
| O  | 1.804559  | 0.000000  | 0.000000  |
| O  | -1.800841 | 0.115780  | 0.000000  |
| Cl | 0.090667  | 2.823374  | 0.000000  |
| Cl | -0.066929 | -2.084195 | 1.766731  |
| Cl | -0.066929 | -2.084195 | -1.766731 |

|   |           |           |           |
|---|-----------|-----------|-----------|
| O | 0.029753  | 0.926510  | 2.386863  |
| O | 0.029753  | 0.926510  | -2.386863 |
| C | 0.041817  | 1.302184  | 3.550293  |
| C | 0.041817  | 1.302184  | -3.550293 |
| C | 0.089317  | 2.781347  | 3.866306  |
| C | 0.089317  | 2.781347  | -3.866306 |
| C | 0.009644  | 0.300340  | 4.682163  |
| C | 0.009644  | 0.300340  | -4.682163 |
| H | 0.107397  | 3.344352  | 2.925348  |
| H | 0.107397  | 3.344352  | -2.925348 |
| H | 0.981853  | 3.009416  | 4.470704  |
| H | -0.786746 | 3.066211  | -4.470704 |
| H | -0.786746 | 3.066211  | 4.470704  |
| H | 0.981853  | 3.009416  | -4.470704 |
| H | -0.022885 | -0.712660 | 4.262222  |
| H | -0.022885 | -0.712660 | -4.262222 |
| H | 0.898828  | 0.426842  | 5.320601  |
| H | -0.869590 | 0.483631  | -5.320601 |
| H | -0.869590 | 0.483631  | 5.320601  |
| H | 0.898828  | 0.426842  | -5.320601 |

**Table S-4.** Cartesian coordinates (Å) for [UO<sub>2</sub>Cl<sub>3</sub>ac]<sup>-</sup>.

|    | X         | Y         | Z         |
|----|-----------|-----------|-----------|
| U  | 0.000000  | 0.000000  | 0.000000  |
| O  | 1.810037  | 0.000000  | 0.000000  |
| O  | -1.798148 | 0.207117  | 0.000000  |
| Cl | -0.151024 | -2.630992 | 0.000000  |
| Cl | 0.022991  | 0.400532  | 2.660622  |
| Cl | 0.022991  | 0.400532  | -2.660622 |
| O  | 0.143192  | 2.494548  | 0.000000  |
| C  | 0.213452  | 3.718555  | 0.000000  |
| C  | 0.256995  | 4.477119  | 1.304174  |

|   |           |          |           |
|---|-----------|----------|-----------|
| C | 0.256995  | 4.477119 | -1.304174 |
| H | 1.177251  | 5.079853 | 1.357025  |
| H | -0.588246 | 5.181196 | -1.357025 |
| H | -0.588246 | 5.181196 | 1.357025  |
| H | 1.177251  | 5.079853 | -1.357025 |
| H | 0.216434  | 3.770497 | 2.140118  |
| H | 0.216434  | 3.770497 | -2.140118 |
